# Supplementary material for: Identification and In Silico Characterization of a Novel COLGALT2 Gene Variant in a Child with Mucosal Rectal Prolapse
Source: MDPI journal article supplement (doi:10.3390/ijms23073670), 2022-03-27

## Supplementary Materials

### **Identification and *in silico* characterization of a novel *COLGALT2* gene variant in a child with mucosal rectal prolapse.**

Anna Sadakierska-Chudy<sup>1</sup>, Paweł Szymanowski<sup>2</sup>, Arleta Lebioda<sup>3</sup>, Rafał Płoski<sup>4</sup>

<sup>1</sup> Department of Genetics, Faculty of Medicine and Health Sciences, Andrzej Frycz Modrzewski Krakow University, Krakow, Gustawa Herlinga-Grudzinskiego 1, 30-705 Krakow, Poland, asadakierska-chudy@afm.edu.pl

<sup>2</sup> Department of Gynecology and Obstetrics, Faculty of Medicine and Health Sciences, Andrzej Frycz Modrzewski Krakow University, Gustawa Herlinga-Grudzinskiego 1, 30-705 Krakow, Poland, pszymanowski@afm.edu.pl

<sup>3</sup> Department of Molecular Techniques, Department of Forensic Medicine, Wrocław Medical University, M. Curie-Skłodowskiej 52, 50-369 Wrocław, Poland, arleta.lebioda@umw.edu.pl

<sup>4</sup> Department of Medical Genetics, Warsaw Medical University, Pawinskiego 3c, 02-106 Warsaw, Poland, rploski@wp.pl

\*Correspondence: asadakierska-chudy@afm.edu.pl, tel. +48 122524590

**Supplementary Figure S1** The tissue expression of the *COLGALT2* and *COLGALT1* gene and the GLT252 and GLT25D1 proteins, respectively. Images acquired from the Human Protein Atlas ([www.proteinatlas.org](http://www.proteinatlas.org)).

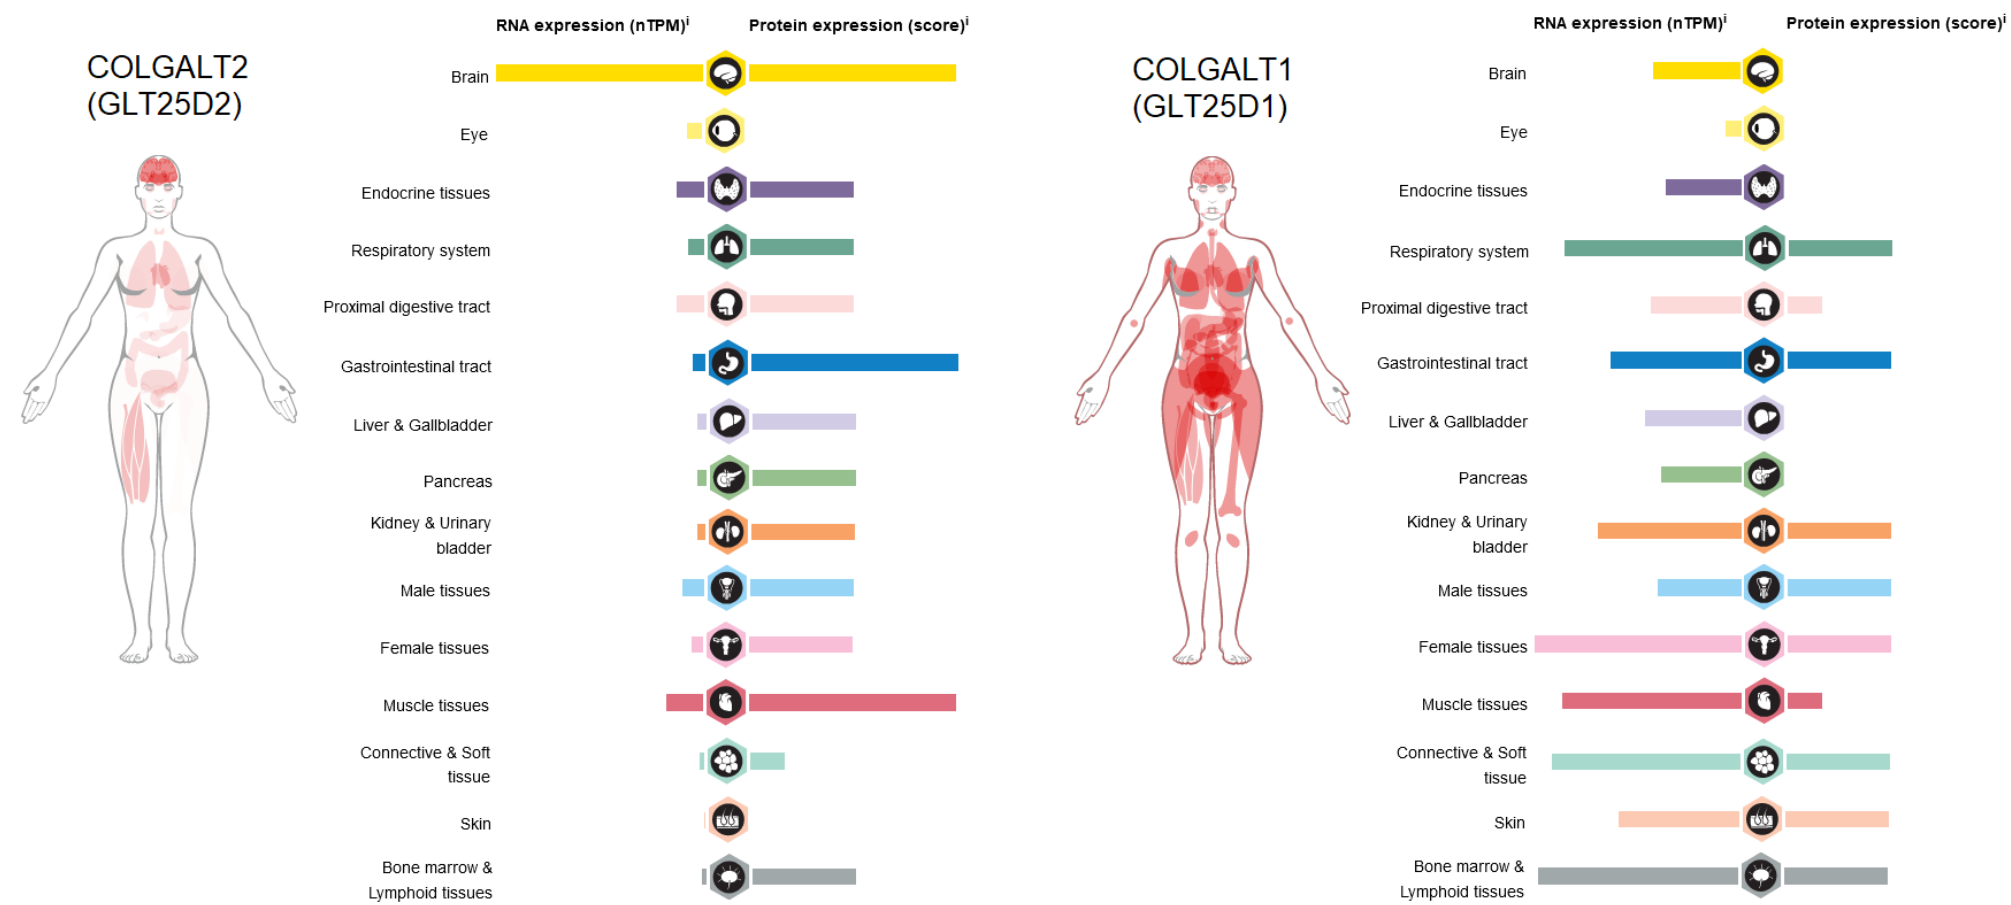

**Supplementary Figure S2** The GLT252 protein secondary structure predicted by Phyre2. Motifs crucial for the enzymatic activity are marked according to previous analysis (Perrin-Tricaud et al., 2011).

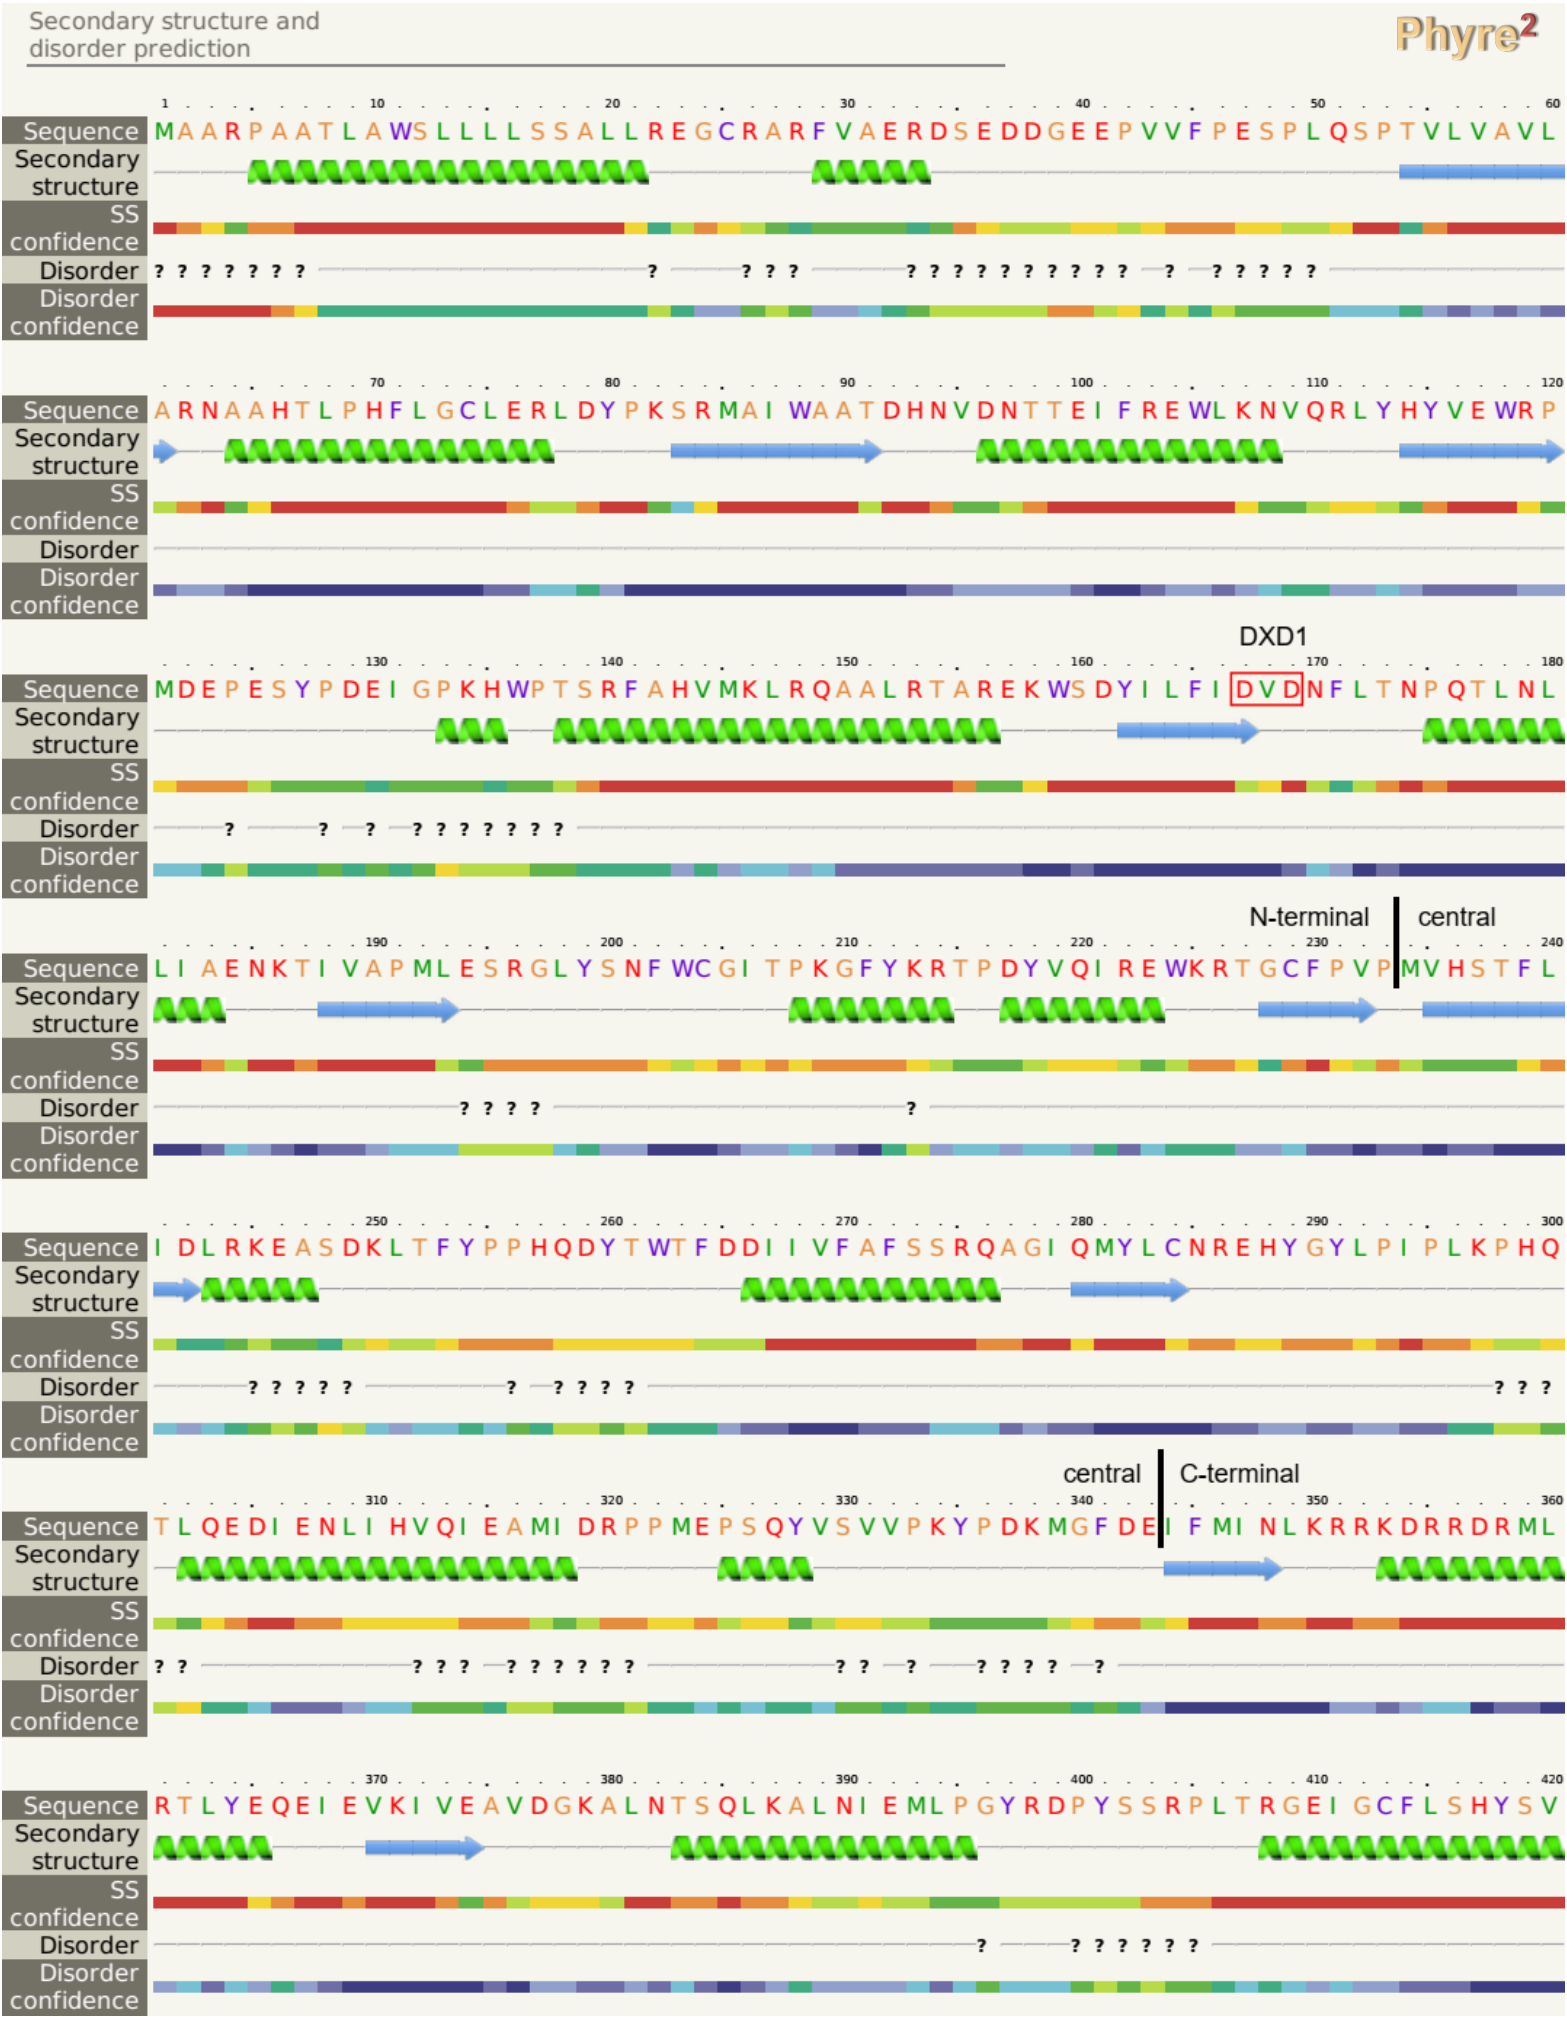

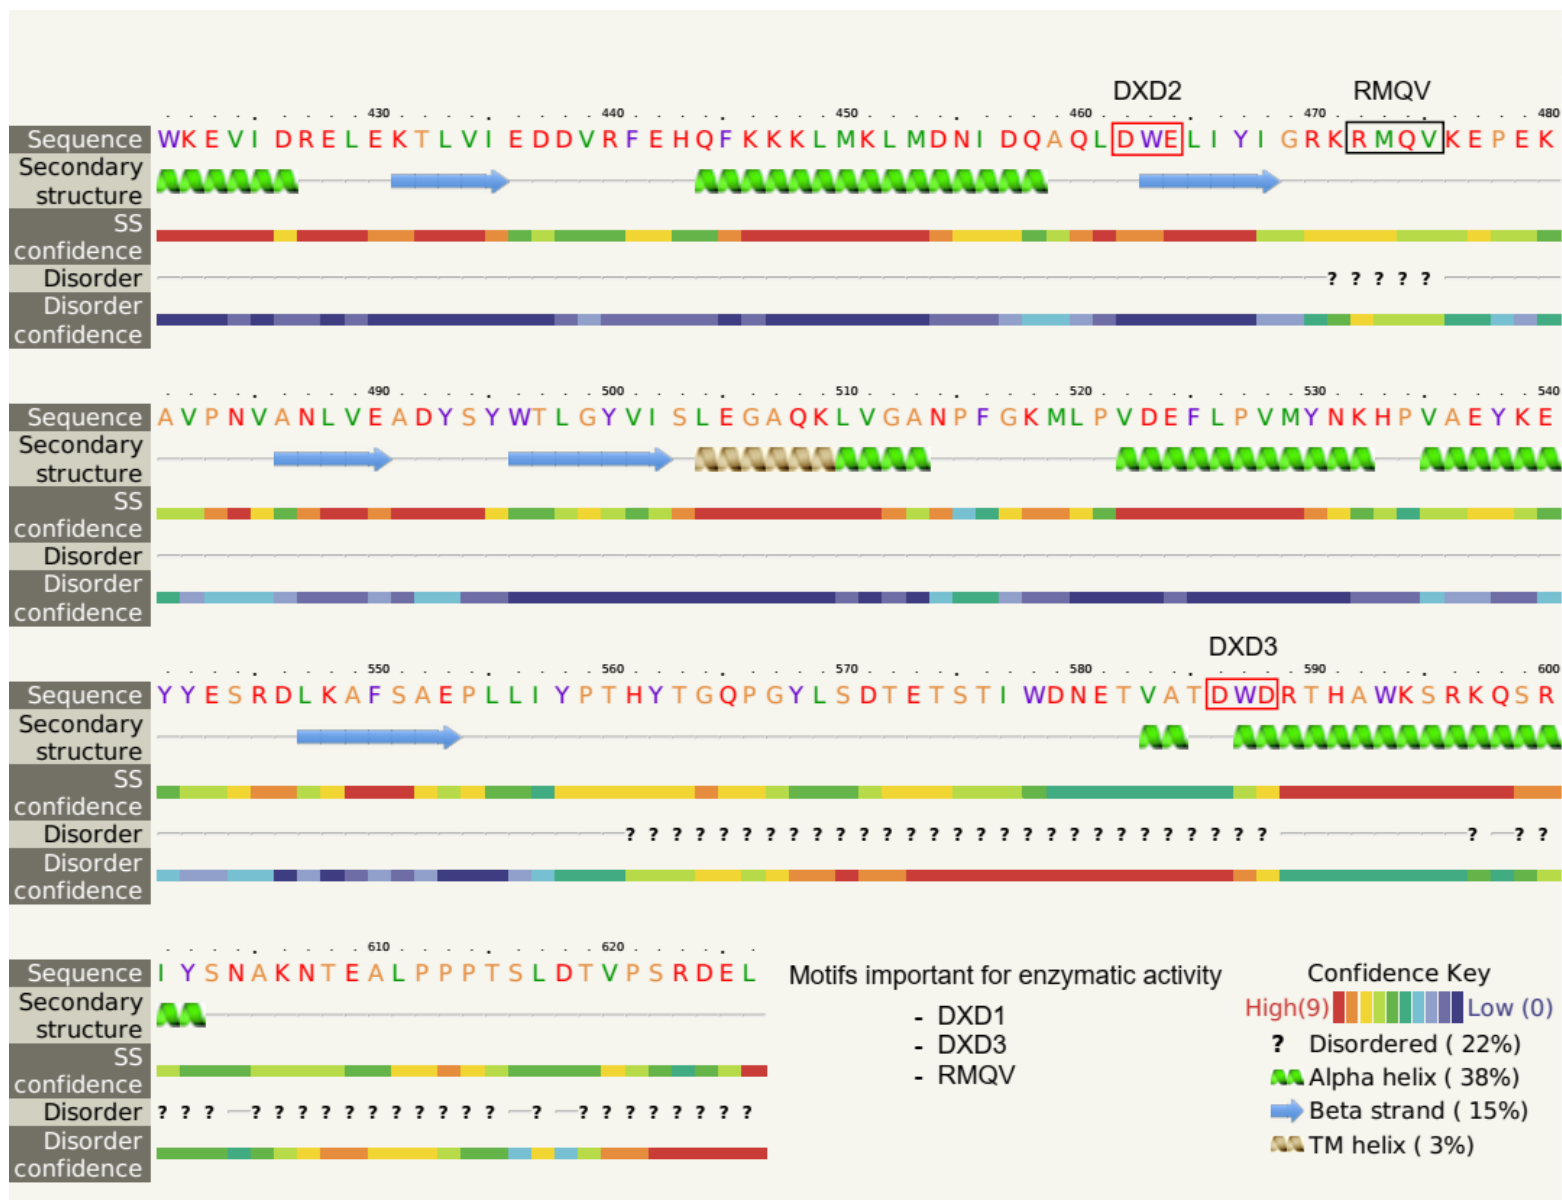

Supplement: s1 [file s1]
